# Supplementary material for: Single-cell expression profiles of <i>ACE2</i> and <i>TMPRSS2</i> reveals potential vertical transmission and fetus infection of SARS-CoV-2
Source: publisher site journal article supplement (doi:10.18632/aging.104015), 2020-10-26
Supplement: Supplementary file [file aging-v12i20-104015-supplementary-material-SD1.pdf]

SUPPLEMENTARY FIGURES

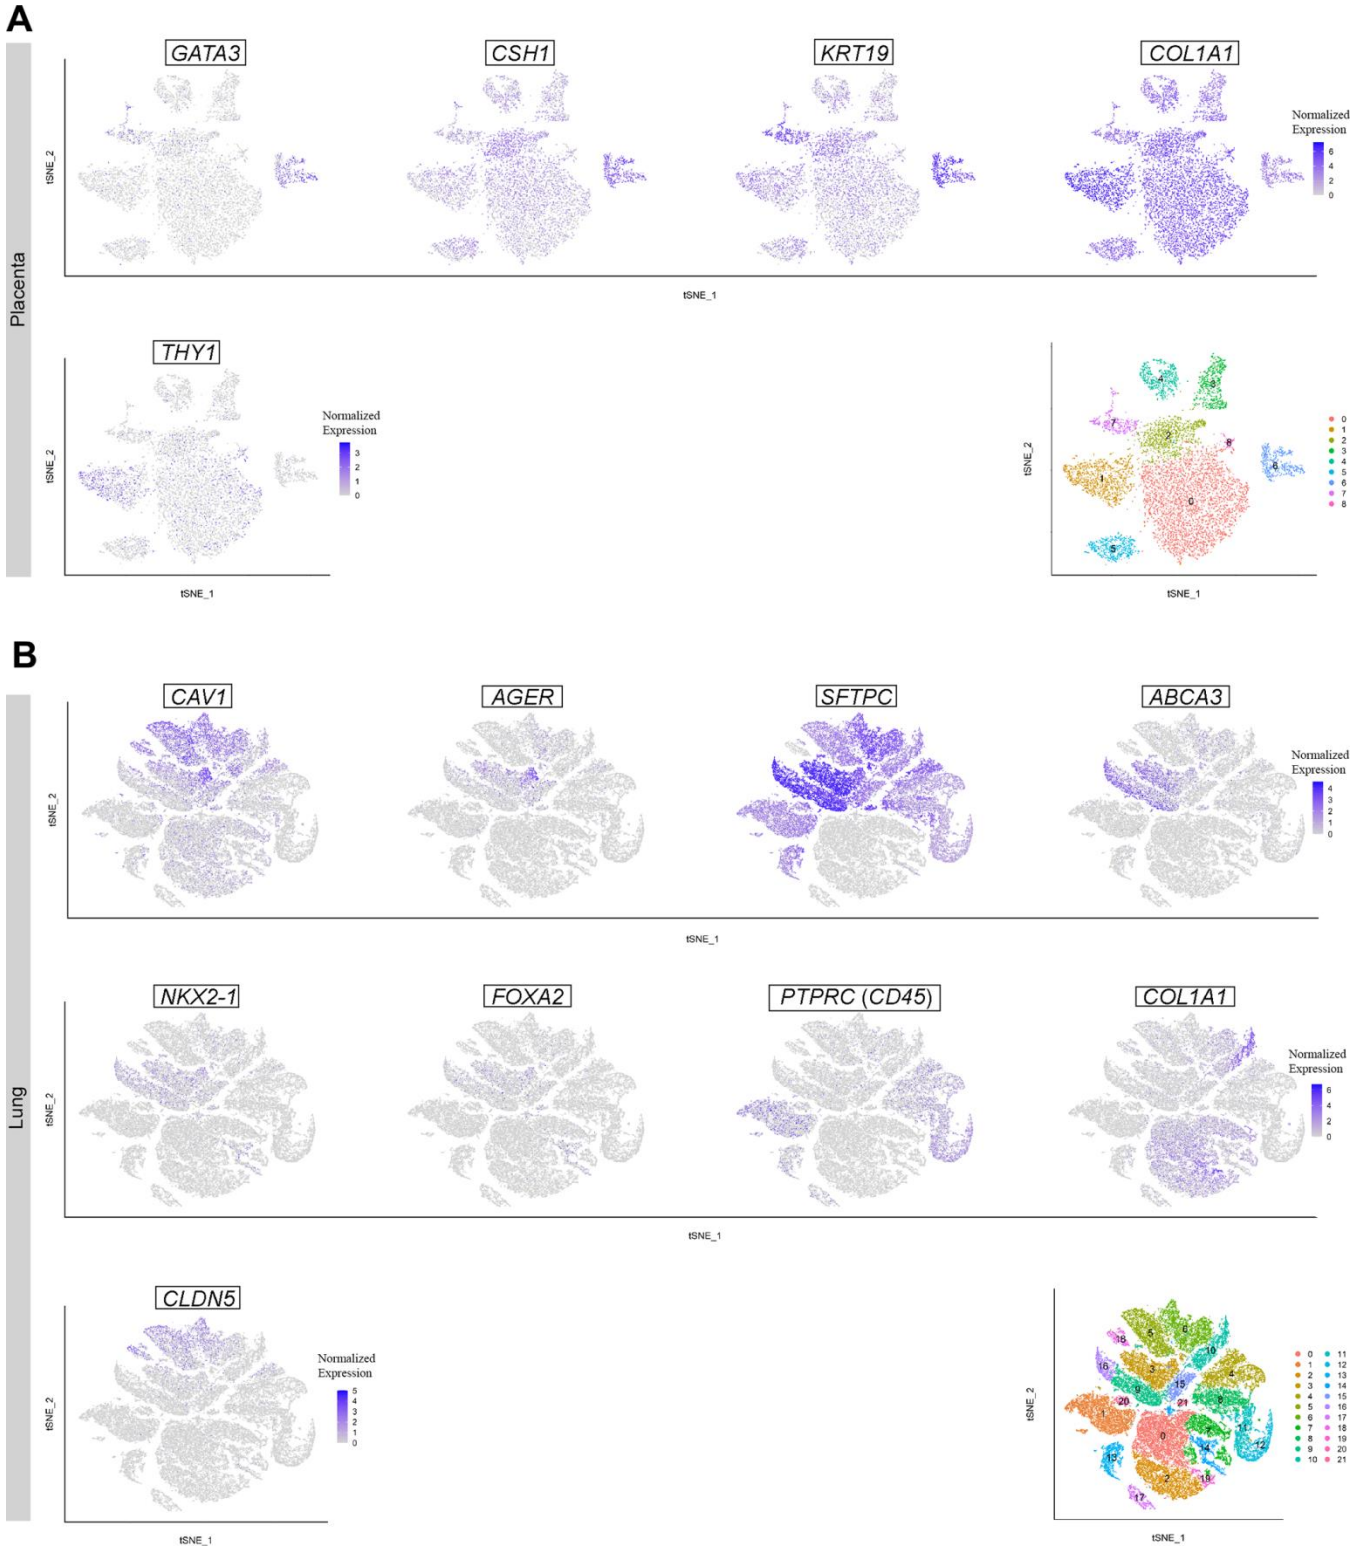

**C**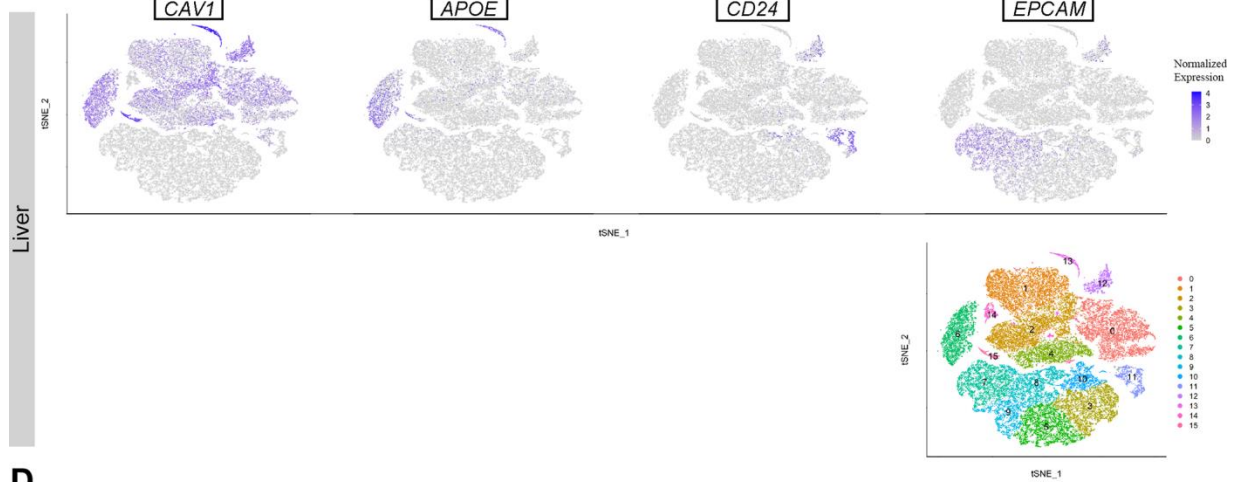**D**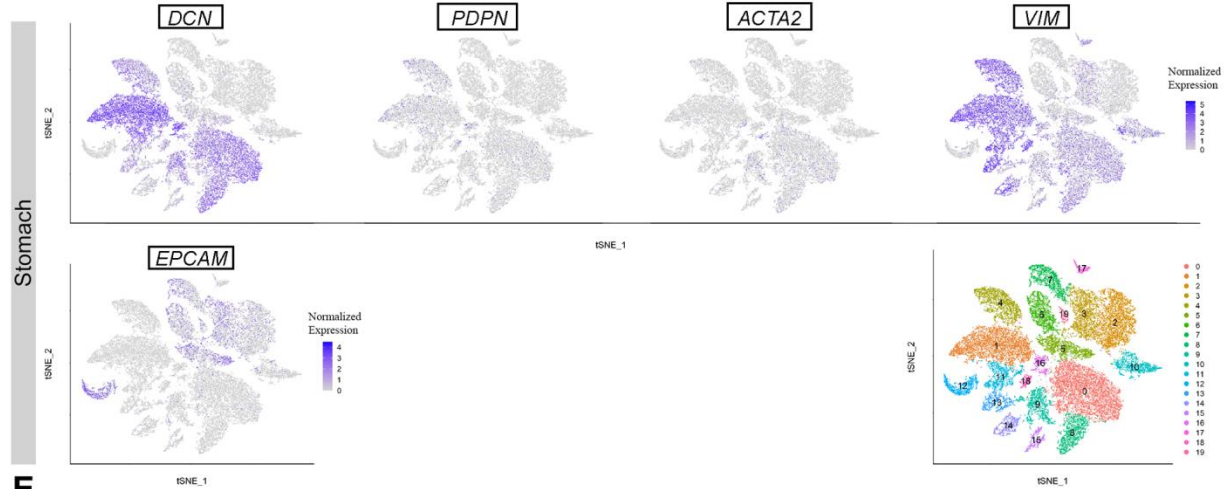**E**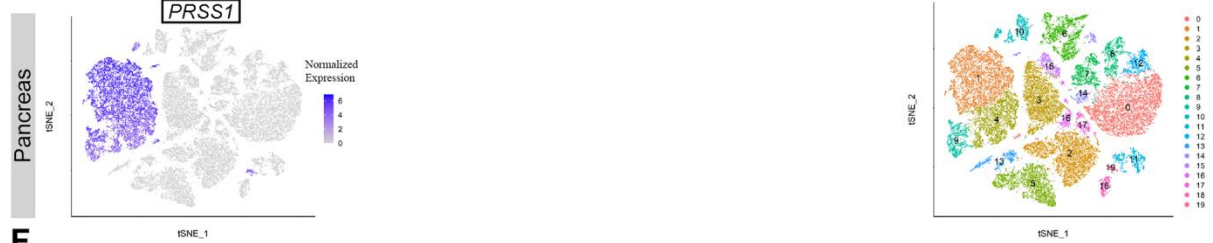**F**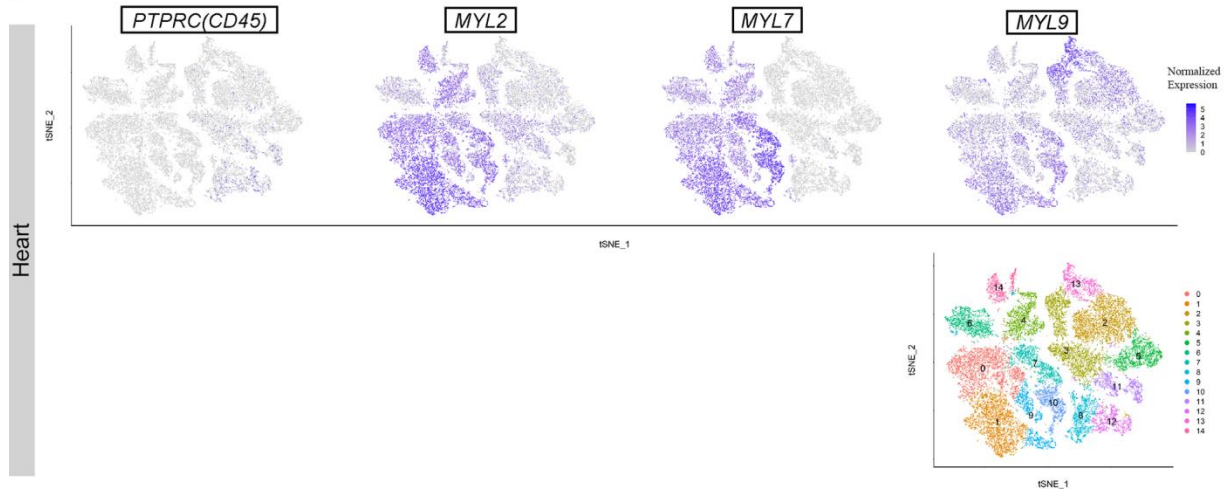

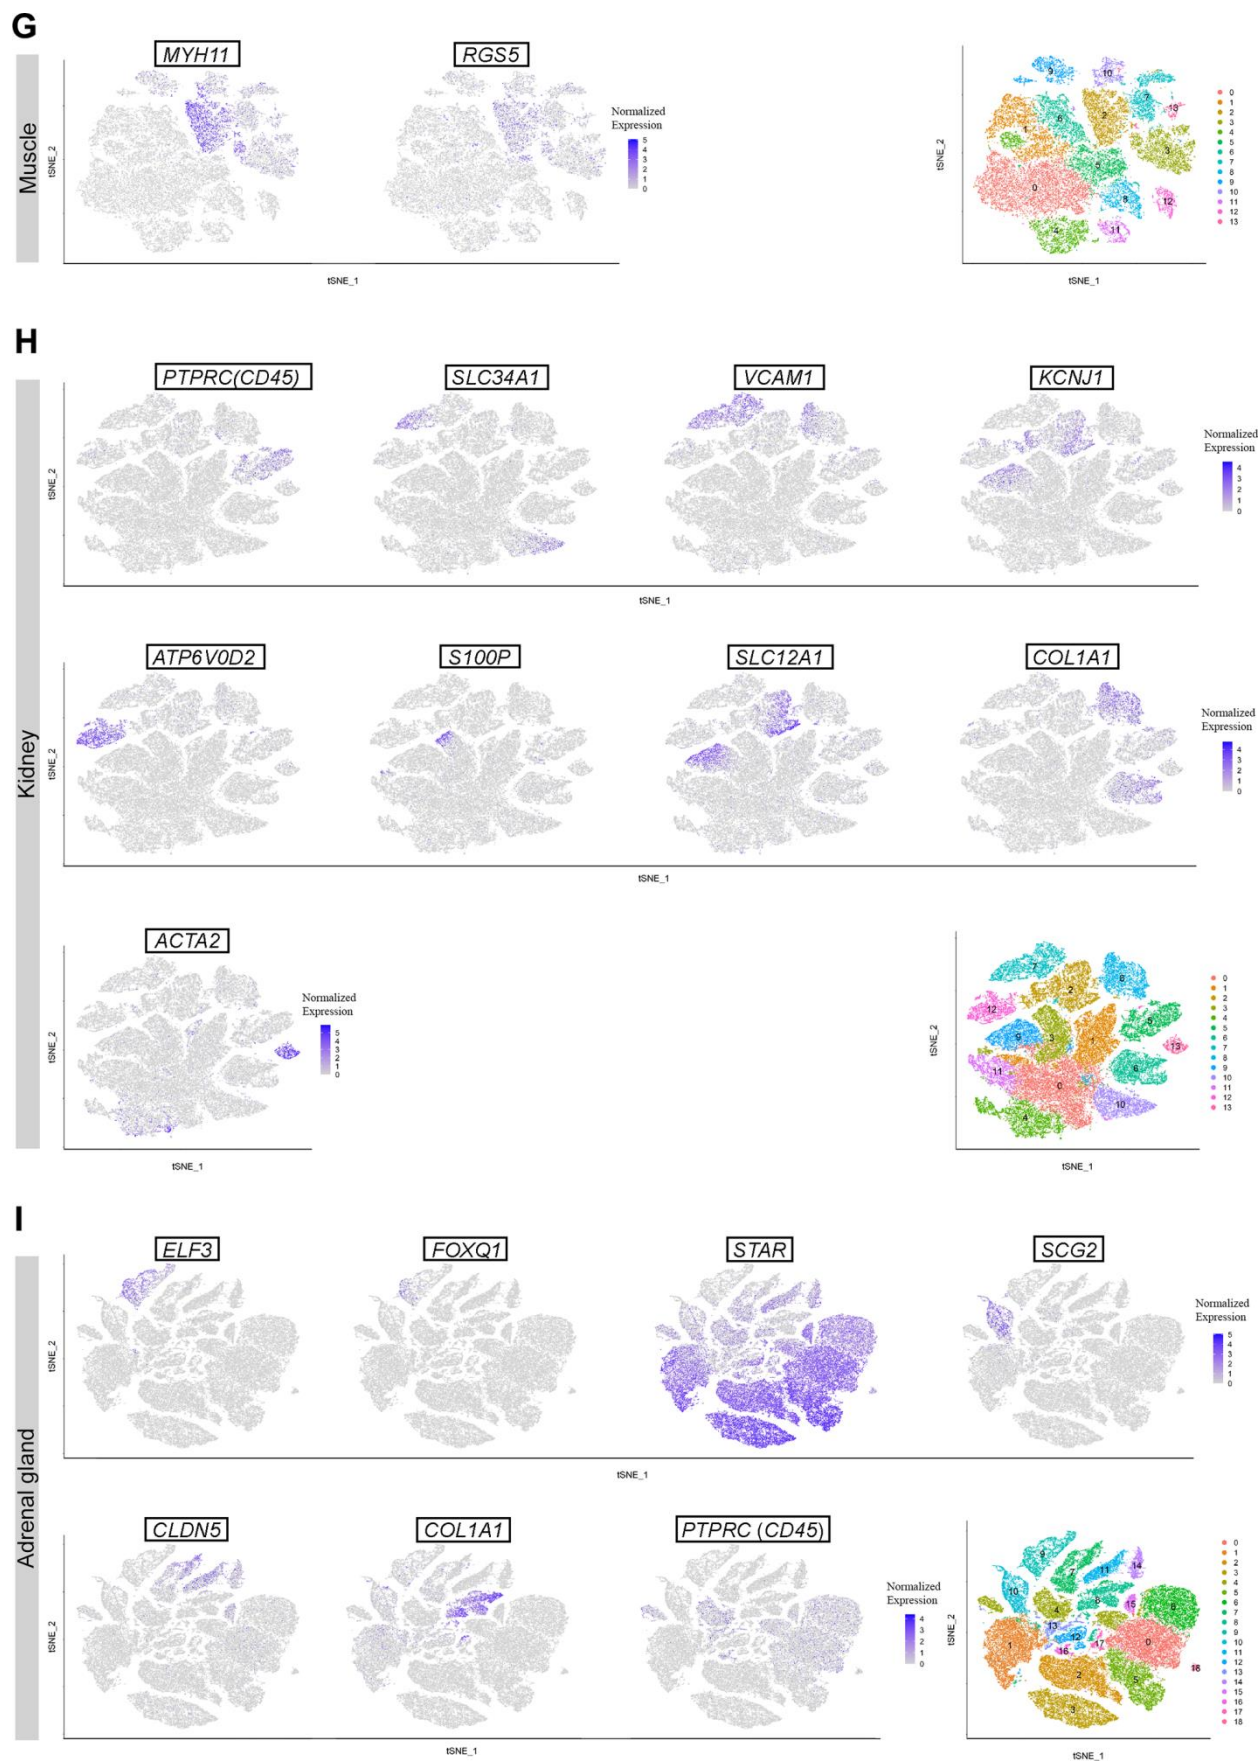

**Supplementary Figure 1. Single-cell markers of each tissue.** t-distributed stochastic neighbor embedding plot displaying cell markers of (A) placenta, (B) lungs, (C) liver, (D) stomach, (E) pancreas, (F) heart, (G) muscle, (H) kidney and (I) adrenal gland tissues.

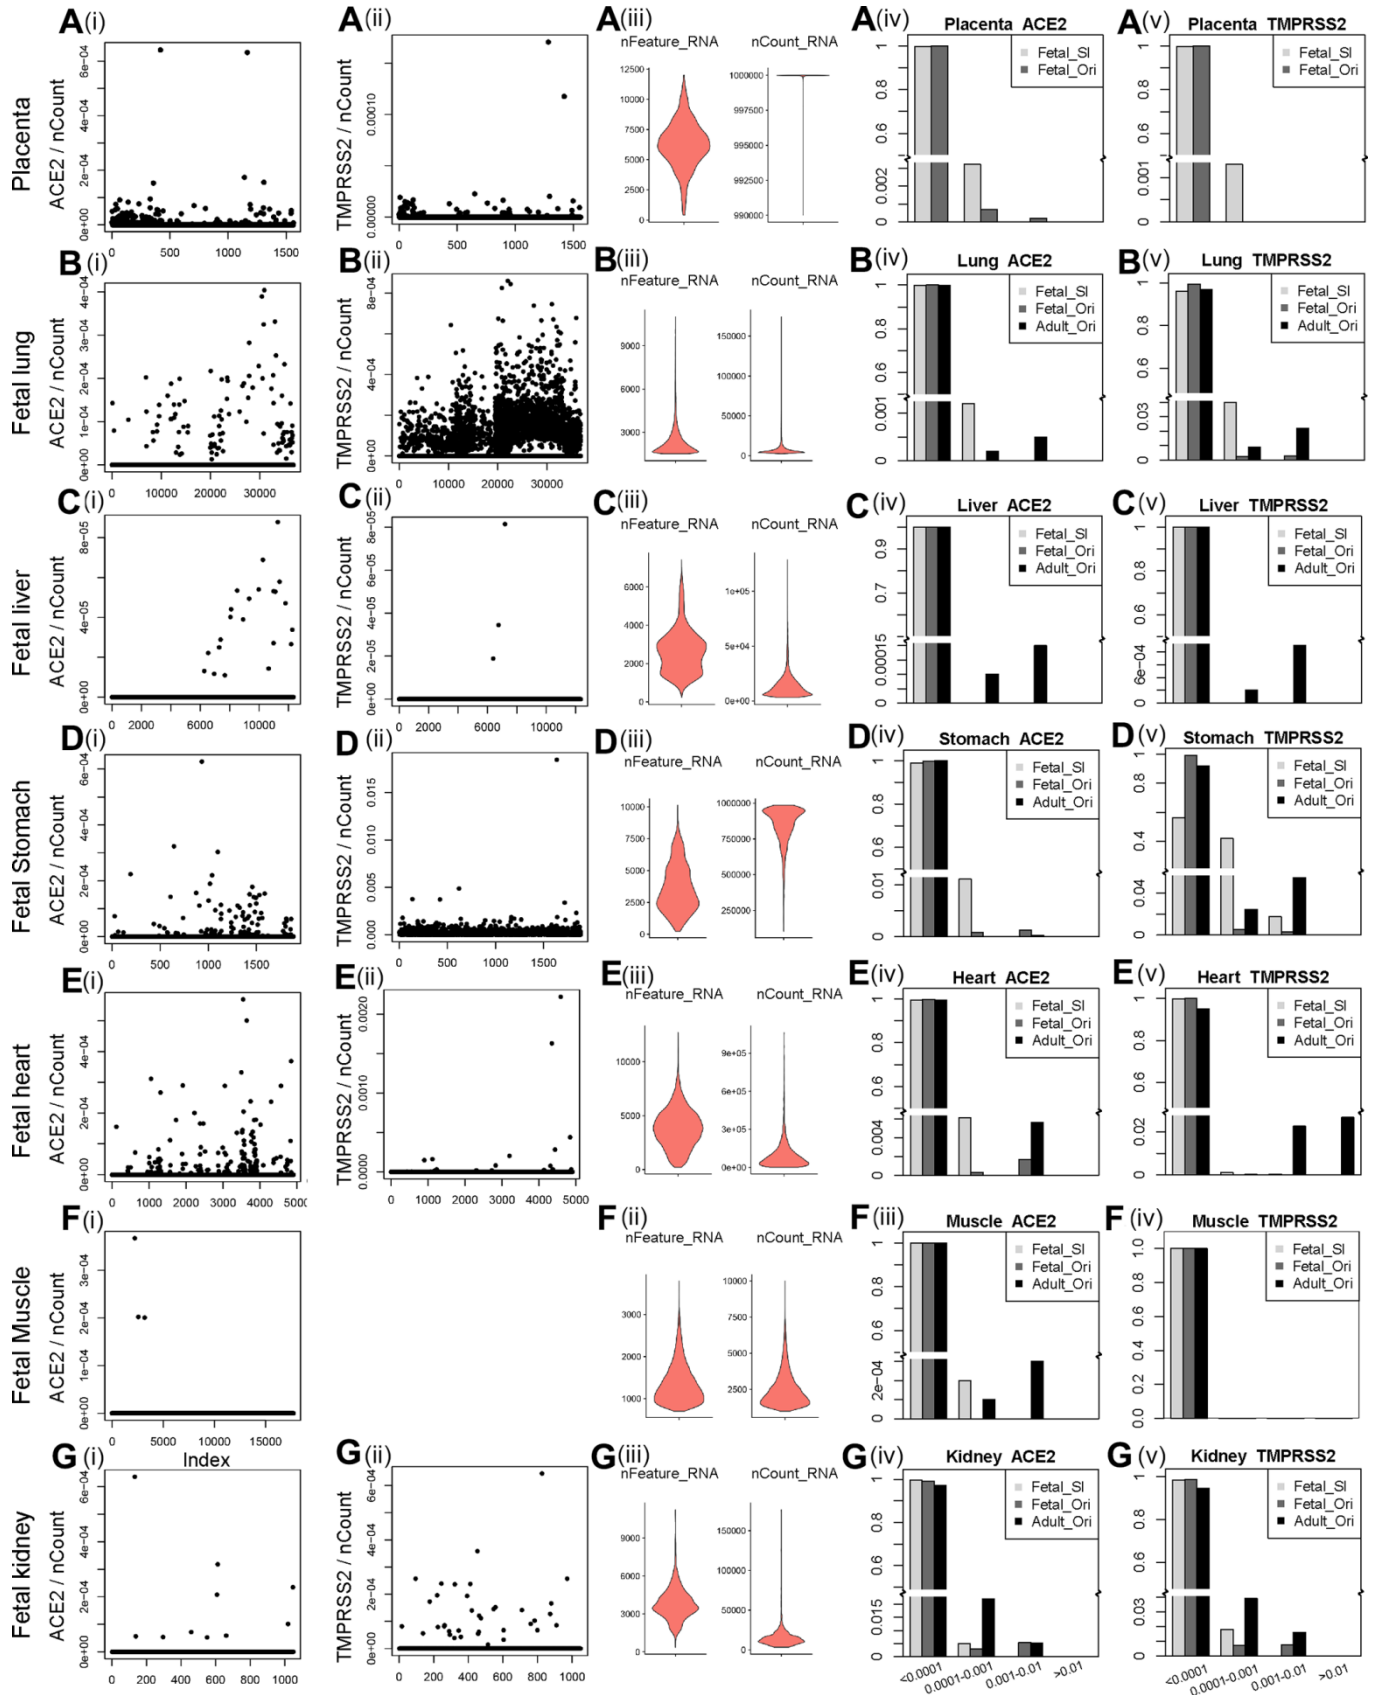

**Supplementary Figure 2. ACE2 and TMPRSS2 expression levels in fetal tissues.** A (i), B (i), C (i), D (i), E (i), F (i) and G (i) show the proportion of ACE2 read counts versus total read counts in placenta, and fetal lungs, liver, stomach, heart, muscle and kidney, respectively. A

(ii), **B** (ii), **C** (ii), **D** (ii), **E** (ii), and **G** (ii) show the proportion of *TMPRSS2* read counts versus total read counts in placenta, and fetal lungs, liver, stomach, heart, muscle and kidney. **A** (iii), **B** (iii), **C** (iii), **D** (iii), **E** (iii), **F** (ii) and **G** (iii) show gene features and RNA counts detected in single-cell RNA sequencing data. **A** (iv), **B** (iv), **C** (iv), **D** (iv), **E** (iv), **F** (iii) and **G** (iv) summarize the *ACE2* expression level in each tissue, where Fetal\_SI stands for the supplementary datasets of fetal tissue (refer to Supplementary Table 1), and Fetal\_Ori and Adult\_Ori stand for the datasets used in the manuscript. **A** (v), **B** (v), **C** (v), **D** (v), **E** (v), **F** (iv) and **G** (v) summarize the *TMPRSS2* expression level in each tissue, where Fetal\_SI stands for the supplementary datasets of fetal tissue (refer to Supplementary Table 1), and Fetal\_Ori and Adult\_Ori stand for the datasets used in the manuscript.
